# Supplementary material for: Altered Domain Functional Network Connectivity Strength and Randomness in Schizophrenia
Source: Front Psychiatry. 2019 Jul 23;10:499. doi: 10.3389/fpsyt.2019.00499 (PMC6664085; doi:10.3389/fpsyt.2019.00499)
Supplement: Supplementary file 3 [file Table_2.xlsx]

## Sheet: Sheet1
Whole Brain Randomness Results
Gaussianity Test for Transformed Variable
Cannot reject normality if p > 0.05
Type of Test	p-value	Transformation Used
Lilliefors	0.31506	inverse_squared
Kolmogorov-Smirnov	0.72857	inverse_squared
Group Difference Analysis (t-test)
HC Mean	SZ Mean	Mean of residuals from TX[HC]	Mean of residuals from TX[SZ]	t-value	p-value	sd	df	Cohen- D
25.7742	26.3307	0.00147413	0.00172104	4.36806	1.76703e-05	0.00046881	280	0.526679
PANSS Results
Type		Constant	Sex	Age	meanFD	Site	CSZ Medication	PANSS
General	coefficient	0.00185962	0.000173233	6.13789e-06	-0.000772901	-2.91878e-05	-4.99918e-07	-5.71743e-06
General	p-value	1.07728e-11	0.0739045	0.112541	0.0185893	0.161573	0.0776312	0.337938
Positive	coefficient	0.00167685	0.000174993	5.48393e-06	-0.000762576	-2.53467e-05	-5.32412e-07	2.65309e-06
Positive	p-value	2.09664e-11	0.0722965	0.168633	0.0209839	0.22411	0.0606927	0.789265
Negative	coefficient	0.00195272	0.000138281	5.90448e-06	-0.000772104	-3.23521e-05	-4.97908e-07	-1.55259e-05
Negative	p-value	6.19824e-14	0.155982	0.120459	0.0174037	0.117388	0.0744271	0.0633687
CMINDS Results
Type		Constant	Sex	Age	meanFD	Site	CSZ Medication	CMINDS Score
SpeedOfProcessing	coefficient	0.00150192	8.47009e-05	5.07253e-06	-0.000662802	-2.19656e-05	8.35859e-08	-1.05109e-05
SpeedOfProcessing	p-value	2.60838e-25	0.207976	0.0920294	0.00999806	0.134471	0.662447	0.719492
AttentionVigilance	coefficient	0.00151905	8.70271e-05	4.62652e-06	-0.000717062	-1.99587e-05	-5.26395e-08	-4.99765e-05
AttentionVigilance	p-value	6.19691e-27	0.202562	0.112029	0.00542657	0.175	0.784127	0.0579554
WorkingMemory	coefficient	0.00152031	8.5364e-05	4.57421e-06	-0.000693042	-2.06131e-05	1.29587e-08	-3.78739e-05
WorkingMemory	p-value	2.02211e-26	0.201945	0.122792	0.00698539	0.158053	0.9465	0.231033
VerbalLearning	coefficient	0.00148251	8.39258e-05	5.40052e-06	-0.000642279	-2.16159e-05	1.19535e-07	1.3469e-06
VerbalLearning	p-value	7.70464e-26	0.218366	0.0644141	0.0128464	0.139825	0.544265	0.96121
VisualLearning	coefficient	0.00154447	0.000106606	3.56846e-06	-0.000638919	-2.23655e-05	-3.64378e-08	-5.13768e-05
VisualLearning	p-value	3.88345e-26	0.118138	0.235213	0.0123564	0.128734	0.846151	0.079072
ReasoningProblemSolving	coefficient	0.0015046	8.24687e-05	4.91308e-06	-0.000654023	-2.15321e-05	6.91223e-08	-1.7994e-05
ReasoningProblemSolving	p-value	4.19116e-26	0.21961	0.100134	0.0102457	0.142755	0.712355	0.536362
CMINDS_composite	coefficient	0.0015157	8.52438e-05	3.9655e-06	-0.000638323	-1.83418e-05	-2.02559e-08	-2.62731e-05
CMINDS_composite	p-value	3.48024e-25	0.221923	0.186681	0.0146737	0.217315	0.923041	0.373818
Additional Results with Diagnosis and Interactions
CMINDS Results
Type		Constant	Sex	Age	meanFD	Site	CSZ Medication	Diagnosis	CMINDS Score	Diagnosis X CMINDS Score
SpeedOfProcessing	coefficient	0.00146357	9.30969e-05	5.43959e-06	-0.000695087	-2.10609e-05	-4.04709e-07	0.000169697	4.39109e-05	-8.43495e-05
SpeedOfProcessing	p-value	2.84752e-24	0.164609	0.0698046	0.00684865	0.148954	0.200937	0.161856	0.270398	0.13986
AttentionVigilance	coefficient	0.00150533	9.00116e-05	4.74125e-06	-0.000770196	-1.91381e-05	-4.19777e-07	0.000144365	-2.10709e-05	-3.79612e-05
AttentionVigilance	p-value	1.88755e-26	0.190779	0.103351	0.00308944	0.196314	0.190446	0.216314	0.604303	0.480647
WorkingMemory	coefficient	0.00149578	9.34264e-05	4.74061e-06	-0.000726897	-2.03256e-05	-4.48121e-07	0.000182263	-1.09487e-05	-3.61741e-05
WorkingMemory	p-value	1.24922e-25	0.163748	0.109792	0.00499014	0.16495	0.161666	0.119553	0.79435	0.558496
VerbalLearning	coefficient	0.00143608	8.09992e-05	5.79308e-06	-0.000656535	-1.95199e-05	-4.18824e-07	0.000178381	6.2915e-05	-9.22822e-05
VerbalLearning	p-value	1.4204e-24	0.232079	0.045546	0.0108468	0.179454	0.186717	0.133867	0.116216	0.0934338
VisualLearning	coefficient	0.00151296	0.000107195	3.8601e-06	-0.000668612	-2.0554e-05	-3.95125e-07	0.000135618	-1.42159e-05	-5.28895e-05
VisualLearning	p-value	5.71998e-25	0.116705	0.199799	0.00949141	0.164697	0.211541	0.250298	0.733713	0.350533
ReasoningProblemSolving	coefficient	0.00148409	8.76537e-05	4.78473e-06	-0.000678072	-2.06851e-05	-4.74757e-07	0.000187926	4.19863e-05	-9.93287e-05
ReasoningProblemSolving	p-value	8.53999e-26	0.190465	0.106821	0.00802437	0.155791	0.13789	0.0957397	0.318555	0.078987
CMINDS_composite	coefficient	0.00147257	8.0409e-05	4.41878e-06	-0.000653539	-1.58392e-05	-4.05703e-07	0.000117554	3.28541e-05	-8.62885e-05
CMINDS_composite	p-value	9.54356e-24	0.250279	0.141122	0.01269	0.2881	0.210757	0.329804	0.459612	0.135935

## Sheet: Sheet2
Whole Brain Modularity Results
Gaussianity Test for Transformed Variable
Cannot reject normality if p > 0.05
Type of Test	p-value	Transformation Used
Lilliefors	0.0924869	square_root
Kolmogorov-Smirnov	0.4747	square_root
Group Difference Analysis (t-test)
HC Mean	SZ Mean	Mean of residuals from TX[HC]	Mean of residuals from TX[SZ]	t-value	p-value	sd	df	Cohen- D
0.948838	1.19692	0.0210344	0.251282	7.80403	1.19945e-13	0.244692	280	0.940971
PANSS Results
Type		Constant	Sex	Age	meanFD	Site	CSZ Medication	PANSS
General	coefficient	0.174891	0.115479	0.00378165	-0.876953	0.000102844	-0.00020135	0.00271092
General	p-value	0.239729	0.0490381	0.105787	1.79568e-05	0.993459	0.237739	0.4518
Positive	coefficient	0.153095	0.117636	0.0032012	-0.86035	0.000803244	-0.000202928	0.00761332
Positive	p-value	0.257806	0.044132	0.179725	2.41557e-05	0.948555	0.230515	0.202091
Negative	coefficient	0.194544	0.122665	0.00393274	-0.878143	-3.50745e-05	-0.000194592	0.00329274
Negative	p-value	0.164236	0.0406689	0.0912308	1.77177e-05	0.997774	0.252392	0.516926
CMINDS Results
Type		Constant	Sex	Age	meanFD	Site	CSZ Medication	CMINDS Score
SpeedOfProcessing	coefficient	0.123124	0.0876601	0.0017873	-0.695055	-0.0133393	0.000332517	-0.022431
SpeedOfProcessing	p-value	0.0808062	0.0172695	0.275301	1.11648e-06	0.0955846	0.00160715	0.160466
AttentionVigilance	coefficient	0.108194	0.0882801	0.00221272	-0.681127	-0.0143208	0.000319816	-0.0246456
AttentionVigilance	p-value	0.113924	0.0184285	0.163847	1.92635e-06	0.0752073	0.00253792	0.0867275
WorkingMemory	coefficient	0.118962	0.0858602	0.00190926	-0.697321	-0.0129877	0.000330685	-0.0233455
WorkingMemory	p-value	0.0872894	0.0192937	0.237993	1.03883e-06	0.10379	0.0019127	0.176817
VerbalLearning	coefficient	0.108838	0.0920545	0.00220793	-0.692273	-0.0140401	0.000342524	-0.0152495
VerbalLearning	p-value	0.113323	0.0137906	0.165268	1.3721e-06	0.0791353	0.0016144	0.313449
VisualLearning	coefficient	0.145544	0.100394	0.00117113	-0.675868	-0.0151647	0.000293225	-0.0377074
VisualLearning	p-value	0.0409033	0.00739882	0.475743	1.94795e-06	0.0599099	0.00462017	0.018706
ReasoningProblemSolving	coefficient	0.119057	0.083623	0.00173967	-0.673705	-0.0127937	0.000329641	-0.0266864
ReasoningProblemSolving	p-value	0.0850008	0.0227307	0.284114	1.7712e-06	0.109833	0.0013895	0.0929002
CMINDS_composite	coefficient	0.144025	0.0980442	0.00130867	-0.691228	-0.0150817	0.000234523	-0.0397408
CMINDS_composite	p-value	0.042145	0.00993598	0.420869	1.67245e-06	0.061794	0.0399213	0.0135765
Additional Results with Diagnosis and Interactions
CMINDS Results
Type		Constant	Sex	Age	meanFD	Site	CSZ Medication	Diagnosis	CMINDS Score	Diagnosis X CMINDS Score
SpeedOfProcessing	coefficient	0.0884549	0.0996602	0.00235504	-0.754517	-0.014094	-0.000232425	0.266737	-0.00884713	0.0116783
SpeedOfProcessing	p-value	0.198826	0.0054769	0.139945	7.03834e-08	0.0700341	0.167884	4.74121e-05	0.676316	0.700475
AttentionVigilance	coefficient	0.0877692	0.103657	0.0024254	-0.735829	-0.0157781	-0.000244745	0.26641	-0.0257389	0.0228457
AttentionVigilance	p-value	0.185896	0.00465342	0.11509	1.59842e-07	0.0445107	0.149085	2.22811e-05	0.2319	0.422322
WorkingMemory	coefficient	0.0939354	0.0999918	0.00228502	-0.76464	-0.0140844	-0.000233532	0.263802	-0.0157082	0.0153691
WorkingMemory	p-value	0.165239	0.00523622	0.146139	5.24727e-08	0.0701544	0.169259	2.90134e-05	0.481124	0.639406
VerbalLearning	coefficient	0.080483	0.0981047	0.00246445	-0.745108	-0.0137742	-0.000234653	0.25915	0.00504852	-0.00831284
VerbalLearning	p-value	0.230534	0.00697976	0.11018	1.1453e-07	0.0760943	0.165491	5.68474e-05	0.812705	0.7763
VisualLearning	coefficient	0.117087	0.108274	0.00165399	-0.747528	-0.01521	-0.000235929	0.244935	-0.0289852	0.011906
VisualLearning	p-value	0.0940493	0.00314982	0.302529	1.05008e-07	0.0542356	0.161934	0.000122888	0.193993	0.693242
ReasoningProblemSolving	coefficient	0.098857	0.0968708	0.00192585	-0.746027	-0.013179	-0.000264565	0.252128	-0.0126934	-0.0117038
ReasoningProblemSolving	p-value	0.14029	0.00684607	0.221884	8.2753e-08	0.0894301	0.120212	3.47824e-05	0.570556	0.696356
CMINDS_composite	coefficient	0.110595	0.106226	0.0018272	-0.745052	-0.0153732	-0.000274072	0.24121	-0.0224534	-0.00188338
CMINDS_composite	p-value	0.113153	0.00443511	0.250461	1.59081e-07	0.0523715	0.111025	0.000197614	0.340473	0.950919

## Sheet: Sheet3
Whole Brain Connectivity Strength Results
Gaussianity Test for Transformed Variable
Cannot reject normality if p > 0.05
Type of Test	p-value	Transformation Used
Lilliefors	0.255241	square_root
Kolmogorov-Smirnov	0.675017	square_root
Group Difference Analysis (t-test)
HC Mean	SZ Mean	Mean of residuals from TX[HC]	Mean of residuals from TX[SZ]	t-value	p-value	sd	df	Cohen- D
0.0520849	0.0387364	-0.00244483	-0.0496838	-7.98594	3.63861e-14	0.0490588	280	-0.962905
PANSS Results
Type		Constant	Sex	Age	meanFD	Site	CSZ Medication	PANSS
General	coefficient	-0.0215465	-0.0256512	-0.000568079	0.147162	-0.000113875	2.74102e-05	-0.000923527
General	p-value	0.473339	0.031058	0.228714	0.00031657	0.964228	0.426325	0.206417
Positive	coefficient	-0.0190224	-0.0262511	-0.00041058	0.142477	-0.000238528	2.71801e-05	-0.00219274
Positive	p-value	0.485201	0.0263382	0.392707	0.000448456	0.924364	0.425312	0.0697452
Negative	coefficient	-0.0288554	-0.0280089	-0.000619939	0.147575	-5.11345e-05	2.50337e-05	-0.0010826
Negative	p-value	0.307817	0.0214616	0.187937	0.00031406	0.983989	0.466829	0.293951
CMINDS Results
Type		Constant	Sex	Age	meanFD	Site	CSZ Medication	CMINDS Score
SpeedOfProcessing	coefficient	-0.0262722	-0.0197397	-5.65312e-05	0.112665	0.00299954	-8.68985e-05	0.0038107
SpeedOfProcessing	p-value	0.0657784	0.00816705	0.864486	8.3922e-05	0.0642816	5.20791e-05	0.238554
AttentionVigilance	coefficient	-0.0222207	-0.0202139	-0.000164399	0.109546	0.00315569	-8.74261e-05	0.0037003
AttentionVigilance	p-value	0.10912	0.00783238	0.609088	0.000138368	0.0531455	5.29325e-05	0.203749
WorkingMemory	coefficient	-0.0243861	-0.0194214	-0.000101723	0.111521	0.00296457	-8.96806e-05	0.00283292
WorkingMemory	p-value	0.0837395	0.00910743	0.756088	0.000100746	0.0671171	3.75761e-05	0.418138
VerbalLearning	coefficient	-0.0238807	-0.0205617	-0.000126402	0.112349	0.0031161	-8.81613e-05	0.00273305
VerbalLearning	p-value	0.0860076	0.00661138	0.694008	9.36465e-05	0.0542017	6.65912e-05	0.371684
VisualLearning	coefficient	-0.0266559	-0.0209956	-4.63467e-05	0.109675	0.00321047	-8.71813e-05	0.00377463
VisualLearning	p-value	0.0669116	0.00618786	0.890196	0.000140321	0.0515419	4.49081e-05	0.247775
ReasoningProblemSolving	coefficient	-0.0253496	-0.019071	-5.53586e-05	0.108976	0.00291583	-8.70715e-05	0.00425674
ReasoningProblemSolving	p-value	0.0703954	0.010457	0.866262	0.000120115	0.0722929	3.50229e-05	0.185433
CMINDS_composite	coefficient	-0.0283006	-0.0219457	-3.38608e-05	0.113575	0.00332756	-7.28144e-05	0.00650539
CMINDS_composite	p-value	0.0497745	0.00464874	0.918467	9.73509e-05	0.0430831	0.00183692	0.0466947
Additional Results with Diagnosis and Interactions
CMINDS Results
Type		Constant	Sex	Age	meanFD	Site	CSZ Medication	Diagnosis	CMINDS Score	Diagnosis X CMINDS Score
SpeedOfProcessing	coefficient	-0.0191165	-0.0222411	-0.000175031	0.125107	0.00316409	3.03961e-05	-0.0556874	0.00120567	-0.00290107
SpeedOfProcessing	p-value	0.169341	0.002189	0.586374	7.95223e-06	0.0442358	0.371432	2.6738e-05	0.778187	0.636197
AttentionVigilance	coefficient	-0.0179153	-0.0237807	-0.000210477	0.120352	0.00354256	3.21204e-05	-0.0576914	0.00524309	-0.00717613
AttentionVigilance	p-value	0.180105	0.00130192	0.496321	1.7382e-05	0.0252601	0.346599	5.45899e-06	0.226682	0.211262
WorkingMemory	coefficient	-0.0195106	-0.0225898	-0.000189413	0.126941	0.00327596	2.68331e-05	-0.056867	0.00273997	-0.00667066
WorkingMemory	p-value	0.15327	0.00181105	0.549817	6.17506e-06	0.0370715	0.433231	8.37465e-06	0.542515	0.313987
VerbalLearning	coefficient	-0.0176345	-0.0216493	-0.000182384	0.122607	0.0030258	3.12113e-05	-0.0523877	-0.00227965	0.00333434
VerbalLearning	p-value	0.193325	0.00323567	0.557322	1.28961e-05	0.0537594	0.360386	5.57084e-05	0.596269	0.572518
VisualLearning	coefficient	-0.0206657	-0.0228832	-0.000154821	0.126156	0.00327236	3.05942e-05	-0.055371	0.00271196	-0.00436404
VisualLearning	p-value	0.145506	0.00214631	0.634494	8.33359e-06	0.0416095	0.371476	2.06447e-05	0.549205	0.476857
ReasoningProblemSolving	coefficient	-0.0214619	-0.0222294	-0.00011456	0.126532	0.00308115	3.16706e-05	-0.0535384	0.00493377	-0.00418594
ReasoningProblemSolving	p-value	0.113465	0.0021955	0.718954	5.75706e-06	0.0497874	0.356843	1.42708e-05	0.275981	0.490178
CMINDS_composite	coefficient	-0.021565	-0.0240286	-0.000144426	0.12595	0.00346751	3.73007e-05	-0.0540653	0.00406123	-0.00198677
CMINDS_composite	p-value	0.127094	0.00151509	0.653369	1.019e-05	0.0308633	0.283469	4.01624e-05	0.394459	0.748512
